# Supplementary material for: Genome-wide identification and expression pattern analysis of lipoxygenase gene family in banana
Source: PubMed Central journal article supplement (PMC8113564; doi:10.1038/s41598-021-89211-6), 2021-05-11
Supplement: 41598_2021_89211_MOESM1_ESM.pdf [file 41598_2021_89211_MOESM1_ESM.pdf]

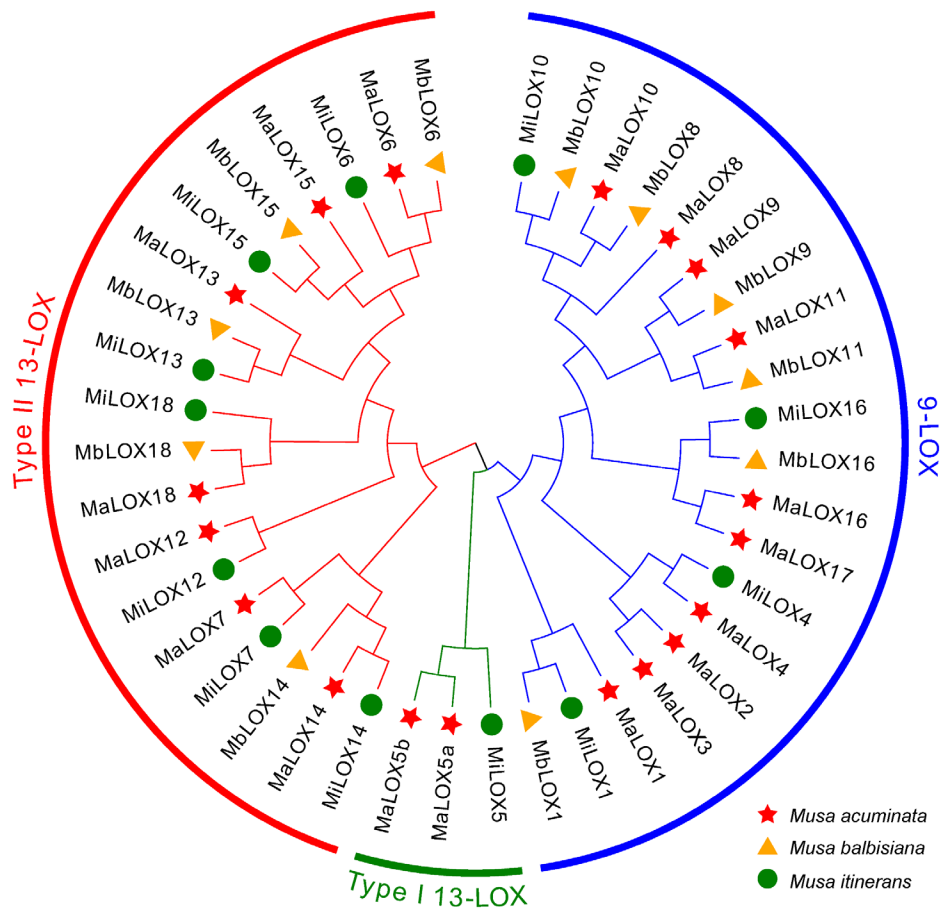

**Figure S1.** Phylogenetic tree of banana LOX genes family.

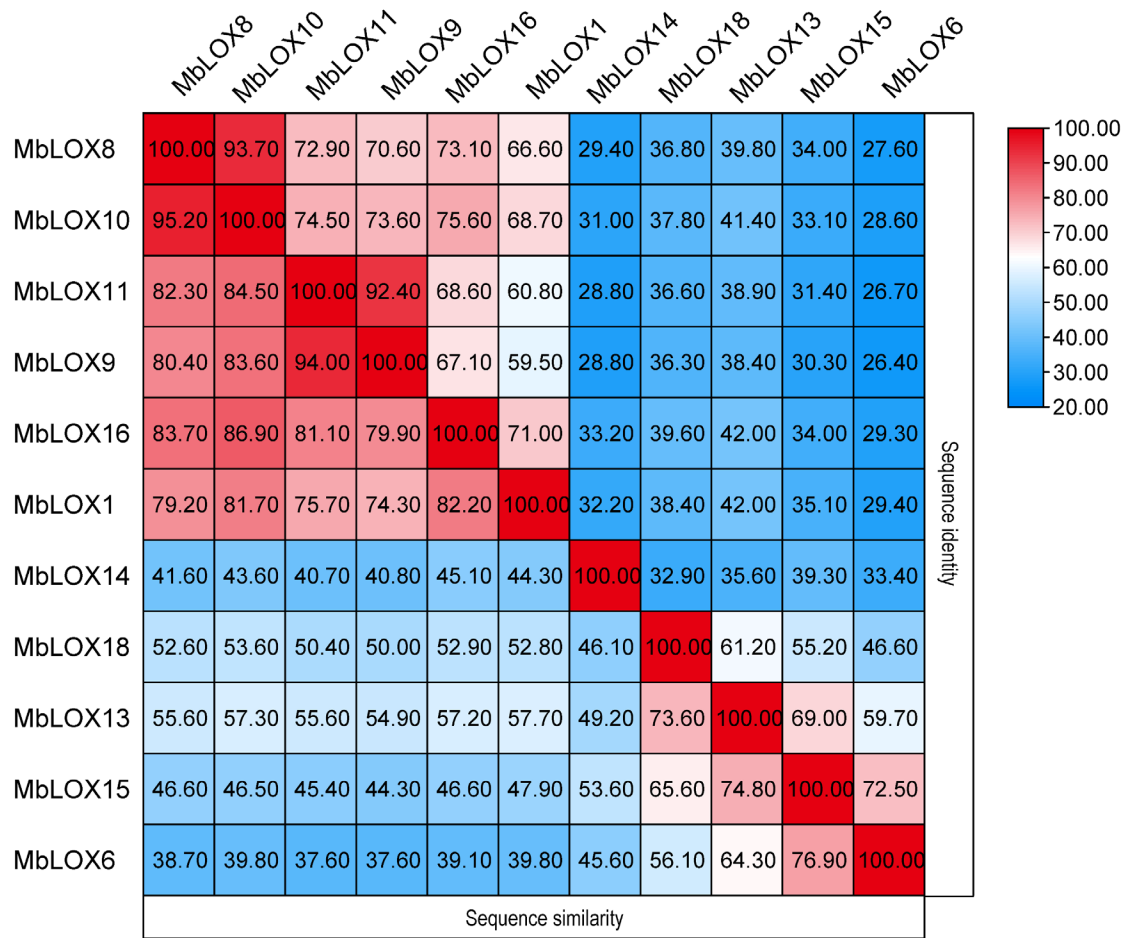

**Figure S2.** Sequence identities and similarities (%) among the *MbLOXs*.

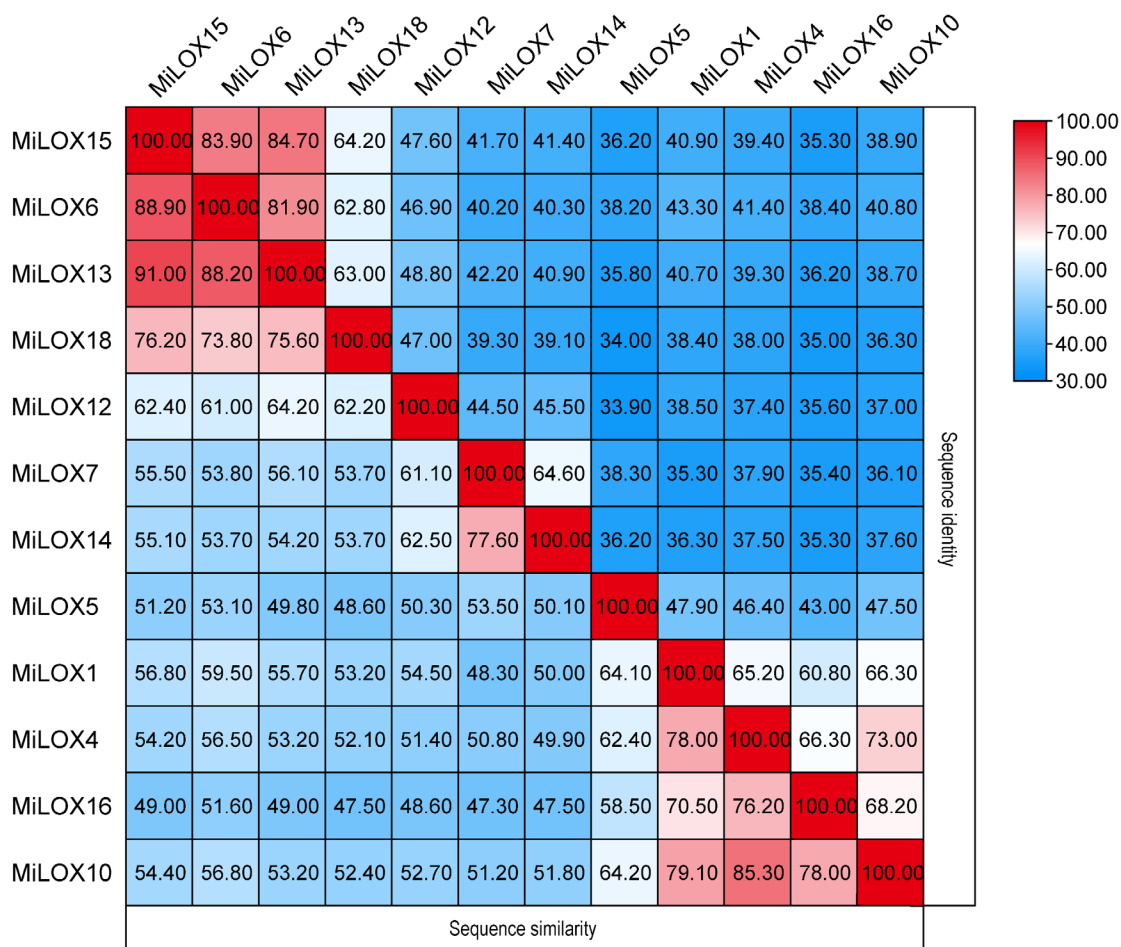

**Figure S3.** Sequence identities and similarities (%) among the *MiLOXs*.

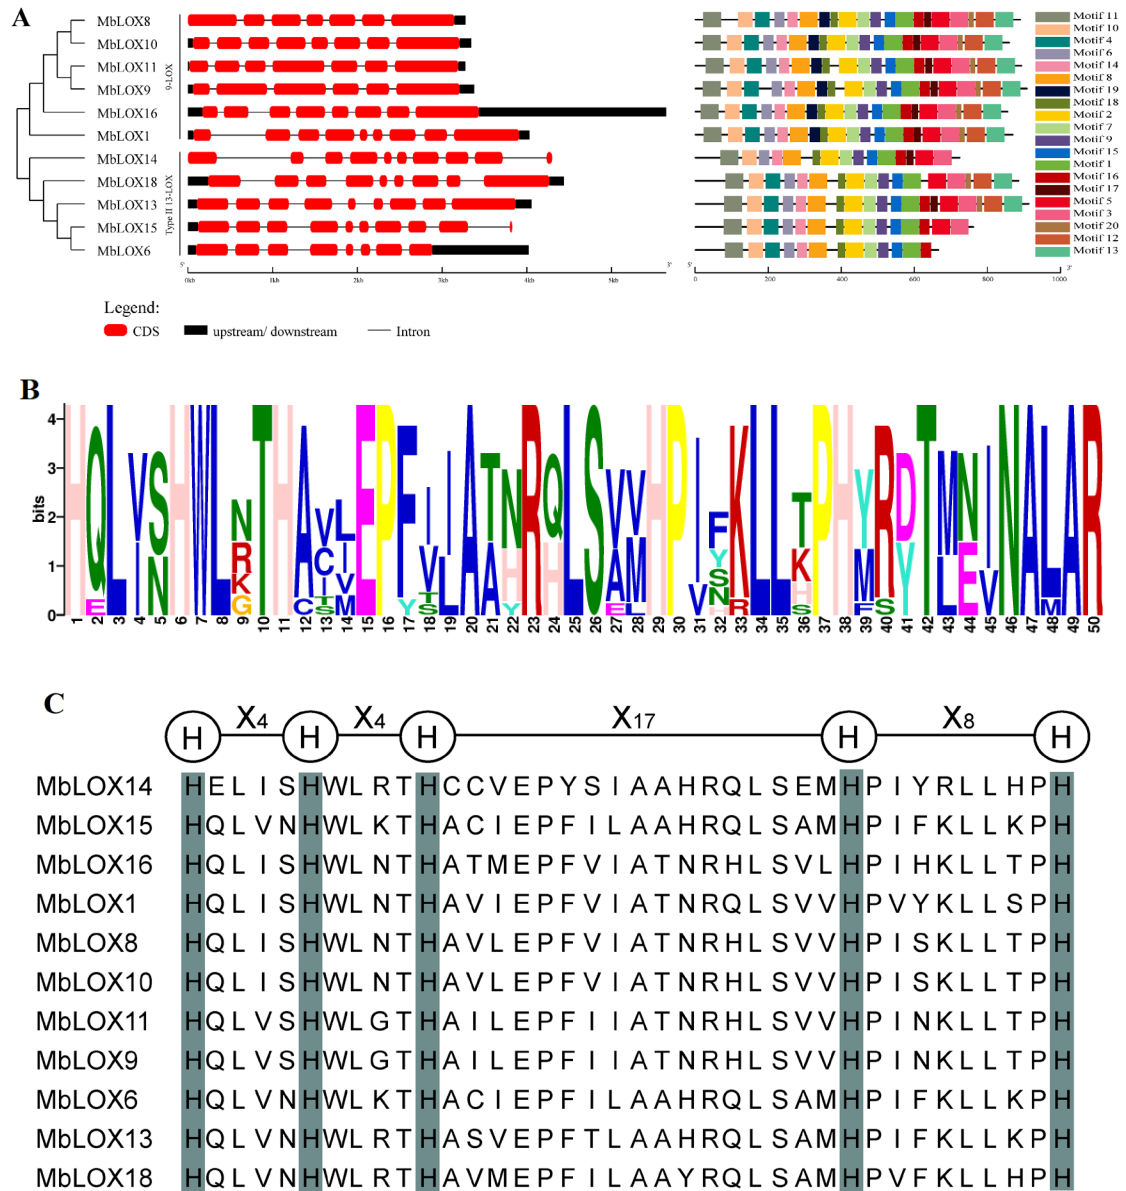

**Figure S4.** Gene structures and conserved motifs (A), Motif 1 sequence (B) and the 38 conserved residues of MbLOX proteins of *MbLOXs* or their encoded proteins. the dark color in C shows highly conserved histidine (His).

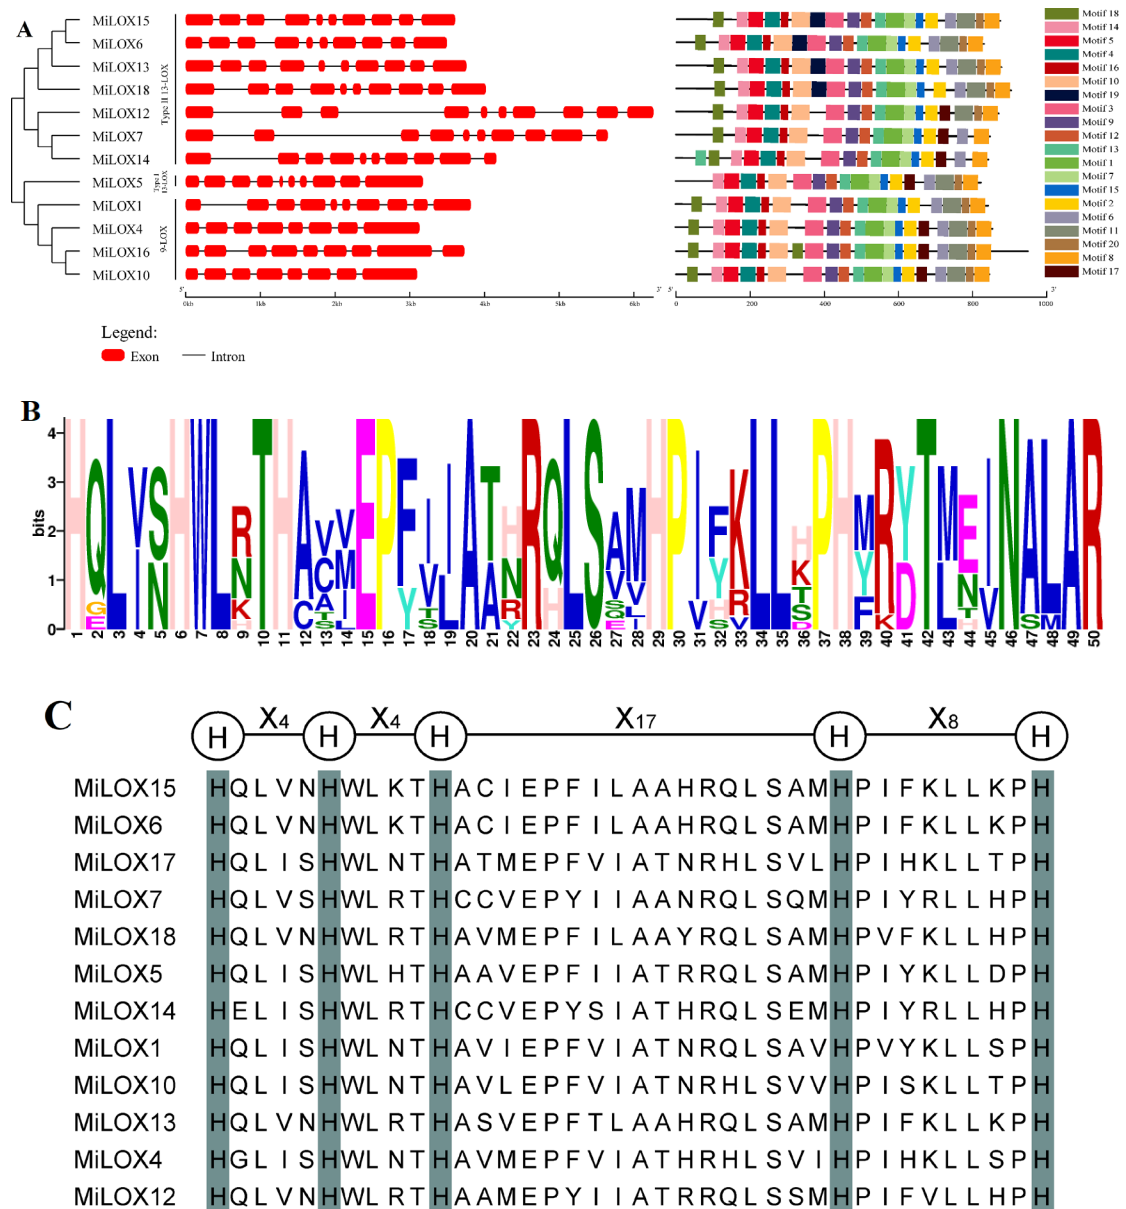

**Figure S5.** Gene structures and conserved motifs (A), Motif 1 sequence (B) and the 38 conserved residues of MiLOX proteins of *MiLOXs* or their encoded proteins. the dark color in C shows highly conserved histidine (His).

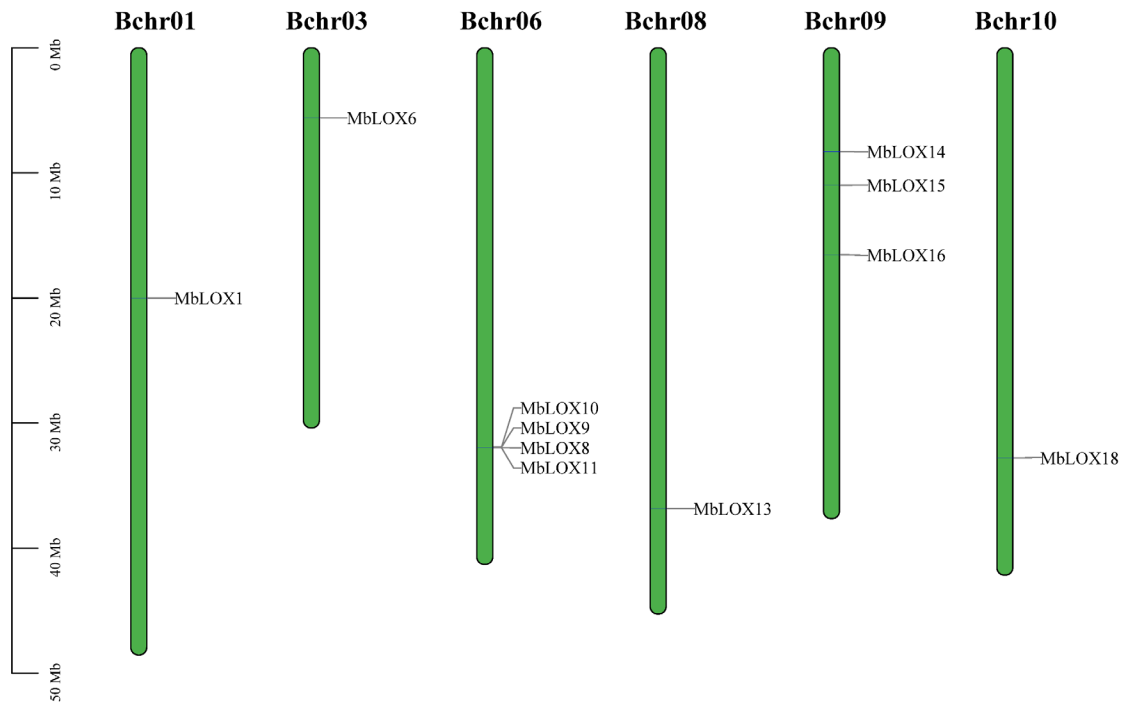

**Figure S6.** Chromosome localization of MbLOX genes.

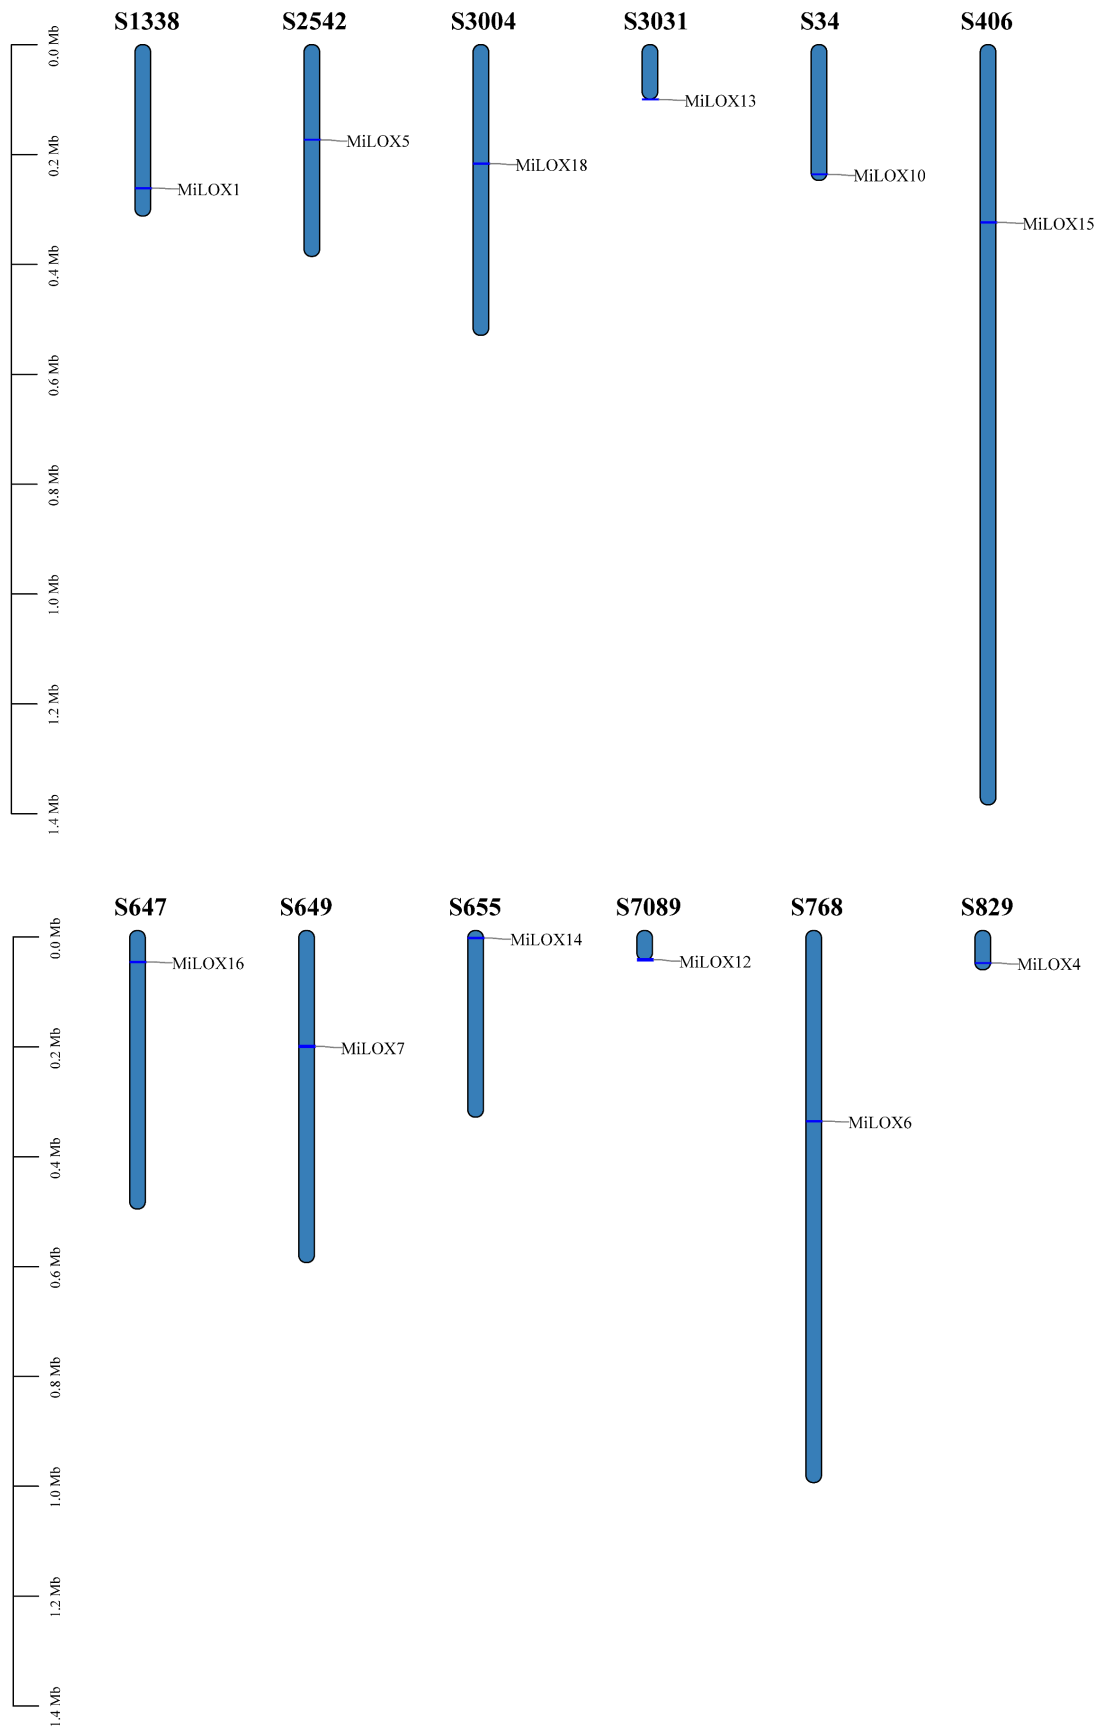

**Figure S7.** Chromosome localization of MiLOX genes.





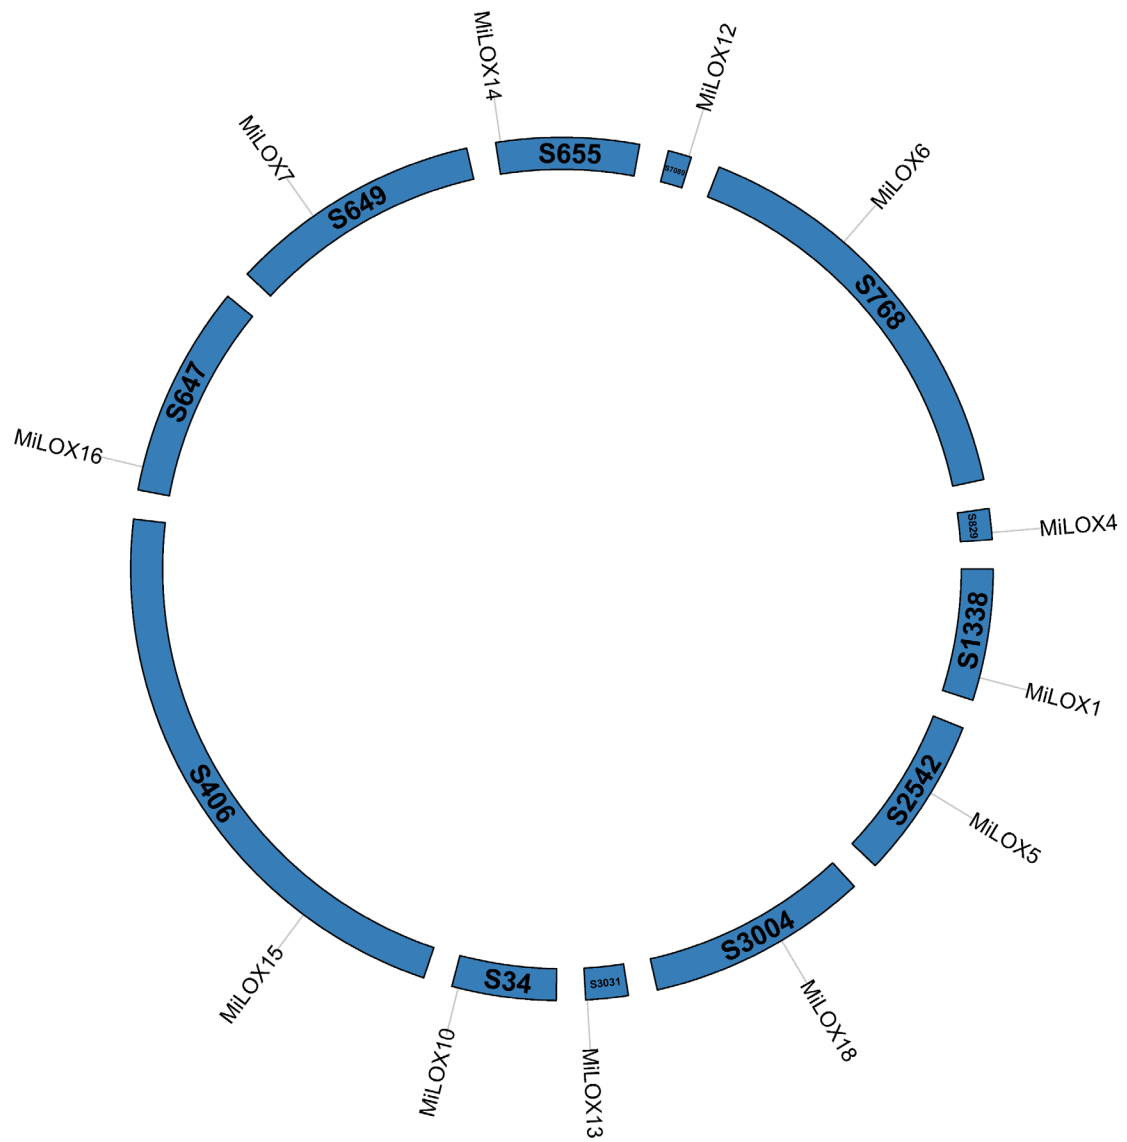

**Figure S9.** Collinear distribution of MiLOX genes.

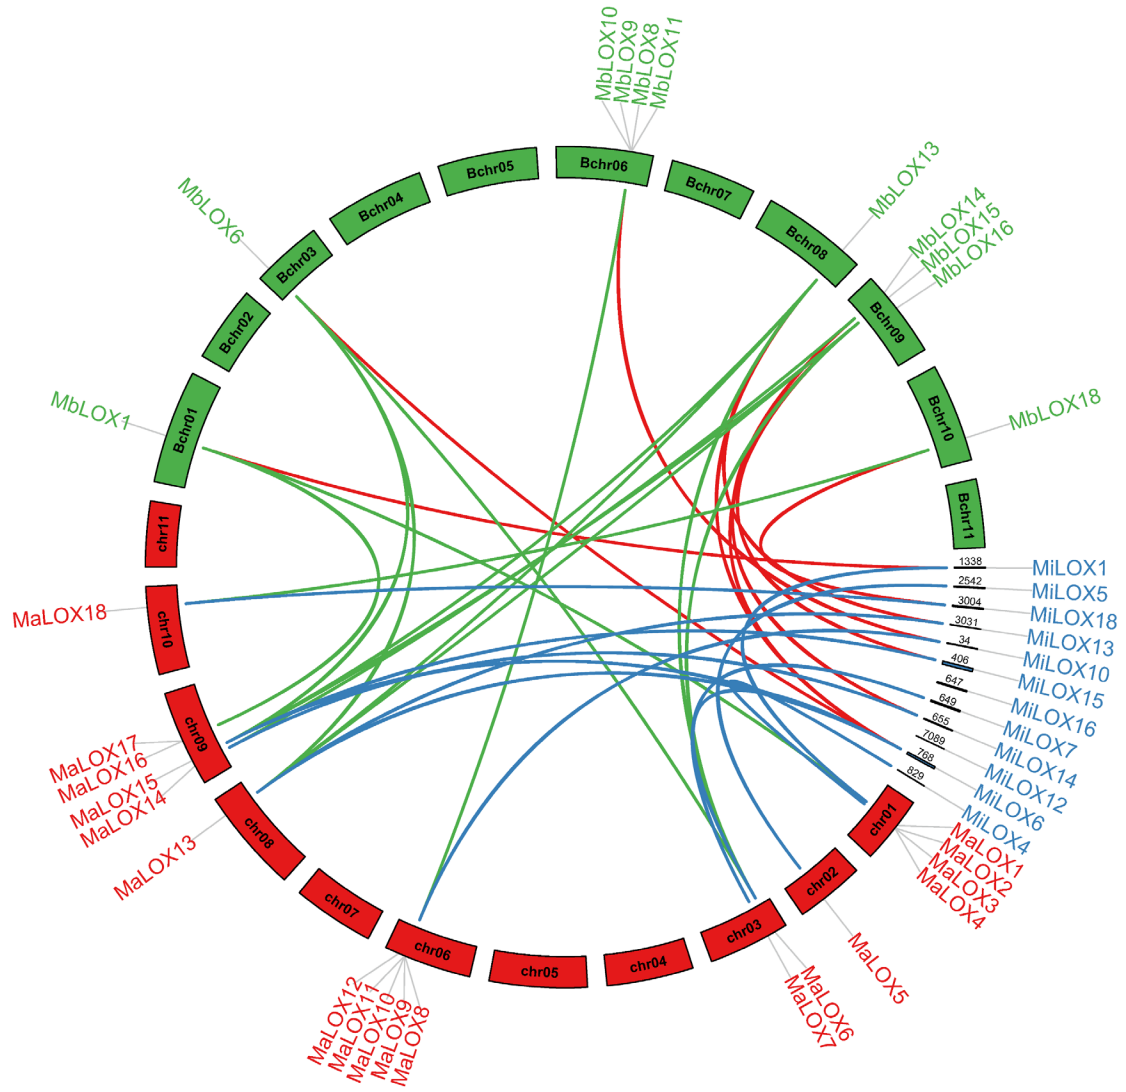

**Figure S10.** Orthologous among *M. acuminata*, *M. balbisiana* and *M. itinerans*.

|                              |                              | MbLOX8          | MbLOX10 | MbLOX11 | MbLOX9 | MbLOX16 | MbLOX1 | MbLOX14 | MbLOX18 | MbLOX15 | MbLOX6 | MbLOX13 |   |
|------------------------------|------------------------------|-----------------|---------|---------|--------|---------|--------|---------|---------|---------|--------|---------|---|
| light responsive             | Function                     |                 |         |         |        |         |        |         |         |         |        |         |   |
|                              | Element                      |                 |         |         |        |         |        |         |         |         |        |         |   |
|                              | G-Box                        | 2               |         | 6       |        | 2       | 2      | 2       | 4       | 7       | 4      | 5       |   |
|                              | Box 4                        | 1               | 1       |         | 1      | 3       | 3      |         | 1       | 1       | 4      | 1       |   |
|                              | TCCC-motif                   |                 | 1       |         |        | 2       |        |         |         | 1       | 2      |         |   |
|                              | GATA-motif                   |                 | 2       |         |        | 1       |        |         | 1       | 2       | 1      |         |   |
|                              | AE-box                       |                 |         |         |        | 2       |        | 6       |         |         |        |         |   |
|                              | GT1-motif                    |                 |         |         |        | 1       |        | 1       | 1       |         | 2      | 1       |   |
| Sp1                          |                              |                 |         |         |        |         | 1      | 3       |         |         | 1      |         |   |
| I-box                        | 1                            | 1               | 1       | 1       |        |         | 1      |         |         | 2       |        |         |   |
| phytohormone responsive      | Abscisic acid                | ABRE            | 2       |         | 5      |         | 2      | 1       | 1       | 5       | 5      | 2       | 4 |
|                              |                              | AuxRR-core      |         |         |        |         | 1      | 3       |         |         |        |         |   |
|                              | Auxin                        | TGA-element     |         | 3       |        | 2       | 1      |         | 1       | 1       |        | 3       |   |
|                              | MeJA                         | CGTCA-motif     | 1       | 1       |        | 2       | 1      |         | 1       | 2       | 2      |         | 2 |
|                              |                              | TGACG-motif     | 1       | 1       |        | 2       | 1      |         | 1       | 2       | 2      |         | 2 |
|                              | gibberellin                  | P-box           |         |         |        |         |        |         |         | 2       |        | 1       | 3 |
|                              |                              | GARE-motif      |         |         |        |         |        |         |         |         |        |         |   |
|                              |                              | TATC-box        |         |         |        |         |        |         | 1       |         |        |         | 1 |
|                              | salicylic acid               | TCA-element     |         | 1       |        | 1       |        |         |         |         | 1      |         |   |
|                              | Ethylene                     | ERE             |         | 1       |        | 1       |        |         | 9       |         |        | 1       |   |
| stress responsive            | anaerobic induction          | ARE             | 1       | 1       | 1      |         |        | 3       | 1       | 2       | 1      | 1       |   |
|                              | anoxic specific inducibility | GC-motif        |         |         |        |         |        |         | 1       |         |        | 1       |   |
|                              | low-temperature              | LTR             | 1       |         | 1      |         |        |         | 1       | 1       | 1      |         |   |
|                              | MYB-drought                  | MBS             |         |         |        |         |        |         | 1       |         |        | 1       |   |
|                              | defense and stress           | TC-rich repeats |         |         |        | 1       |        | 1       |         |         | 1      |         |   |
|                              | Wound                        | WUN-motif       |         |         | 1      |         |        |         |         | 1       |        | 1       |   |
| plant growth and development | meristem                     | CAT-box         |         |         |        |         |        |         | 1       |         |        | 1       |   |
|                              | circadian control            | circadian       |         |         |        |         | 2      | 1       |         |         |        |         |   |
|                              | endosperm                    | GCN4_motif      |         |         |        | 1       |        |         |         |         | 1      |         |   |
|                              | zein metabolism              | O2-site         | 1       | 1       | 1      |         |        | 2       |         |         | 1      |         |   |

**Figure S11.** Analysis of *cis*-acting elements of MbLOX gene family promoter.

| Function                     |                     | Element         | MiLOX15 | MiLOX6 | MiLOX13 | MiLOX18 | MiLOX12 | MiLOX7 | MiLOX14 | MiLOX5 | MiLOX1 | MiLOX4 | MiLOX16 | MiLOX10 |
|------------------------------|---------------------|-----------------|---------|--------|---------|---------|---------|--------|---------|--------|--------|--------|---------|---------|
| light responsive             | light               | Box 4           | 1       | 1      | 2       | 1       | 6       |        |         | 1      | 3      |        | 2       | 1       |
|                              |                     | GATA-motif      | 1       | 2      |         |         |         | 1      | 2       | 1      |        | 1      | 1       |         |
|                              |                     | G-box           | 12      | 2      | 4       | 1       | 6       | 9      | 18      |        | 1      | 7      | 3       | 2       |
|                              |                     | GT1-motif       |         | 2      | 1       | 4       |         |        |         |        | 1      | 2      | 2       |         |
|                              |                     | MRE             | 2       |        |         |         |         | 1      | 1       | 1      | 1      | 1      |         |         |
|                              |                     | Sp1             |         |        |         | 1       | 1       |        | 1       | 1      |        |        |         | 4       |
|                              |                     | TCCC-motif      | 1       | 1      |         | 1       |         | 1      |         | 1      |        |        | 1       |         |
|                              |                     | TCT-motif       | 1       |        |         | 1       | 4       | 1      | 1       |        |        |        |         |         |
| phytohormone responsive      | Abscisic acid       | ABRE            | 8       | 1      | 3       | 1       | 7       | 8      | 16      |        |        | 6      | 3       | 2       |
|                              |                     | AuxRR-core      |         |        |         |         |         | 1      |         | 1      |        |        |         |         |
|                              | Auxin               | TGA-element     | 1       |        | 3       |         |         | 1      |         |        |        |        |         |         |
|                              |                     | CGTCA-motif     | 1       |        |         | 1       | 1       | 3      | 1       | 1      |        | 1      | 1       | 1       |
|                              | MeJA                | TGACG-motif     | 1       |        |         | 1       | 1       | 3      | 1       | 1      |        | 1      | 1       | 1       |
|                              |                     | P-box           |         | 1      | 3       |         |         |        |         |        |        |        |         |         |
|                              | gibberellin         | TATC-box        |         | 1      | 1       |         |         |        |         |        |        | 1      |         |         |
|                              |                     | GARE-motif      |         |        |         |         |         |        |         | 1      |        |        |         |         |
|                              | salicylic acid      | TCA-element     |         |        |         |         | 1       |        | 1       |        |        |        |         |         |
|                              | Ethylene            | ERE             |         |        |         | 1       | 2       | 3      | 5       |        |        |        |         |         |
| stress responsive            | anaerobic induction | ARE             | 3       | 1      |         | 1       | 1       | 2      | 1       | 2      | 2      | 1      |         | 2       |
|                              | low-temperature     | LTR             | 1       |        |         | 1       |         | 3      | 1       | 2      |        |        |         |         |
|                              | MYB-drought         | MBS             |         | 1      | 1       |         | 1       |        |         | 2      |        |        |         |         |
|                              | defense and stress  | TC-rich repeats |         |        |         |         |         |        | 1       |        | 1      |        | 1       |         |
|                              | Wound               | WUN-motif       |         | 1      |         | 1       |         |        |         |        |        | 1      |         | 2       |
| plant growth and development | meristem            | CAT-box         |         |        | 1       | 1       | 1       |        |         |        | 1      |        |         |         |
|                              | circadian control   | circadian       |         |        |         |         |         |        |         | 1      | 2      |        |         |         |
|                              | endosperm           | GCN4_motif      |         | 1      |         | 1       |         | 1      |         | 1      |        |        |         |         |
|                              | zein metabolism     | O2-site         |         |        | 1       |         | 1       |        |         | 4      | 1      | 1      |         |         |

**Figure S12.** Analysis of *cis*-acting elements of MiLOX gene family promoter.

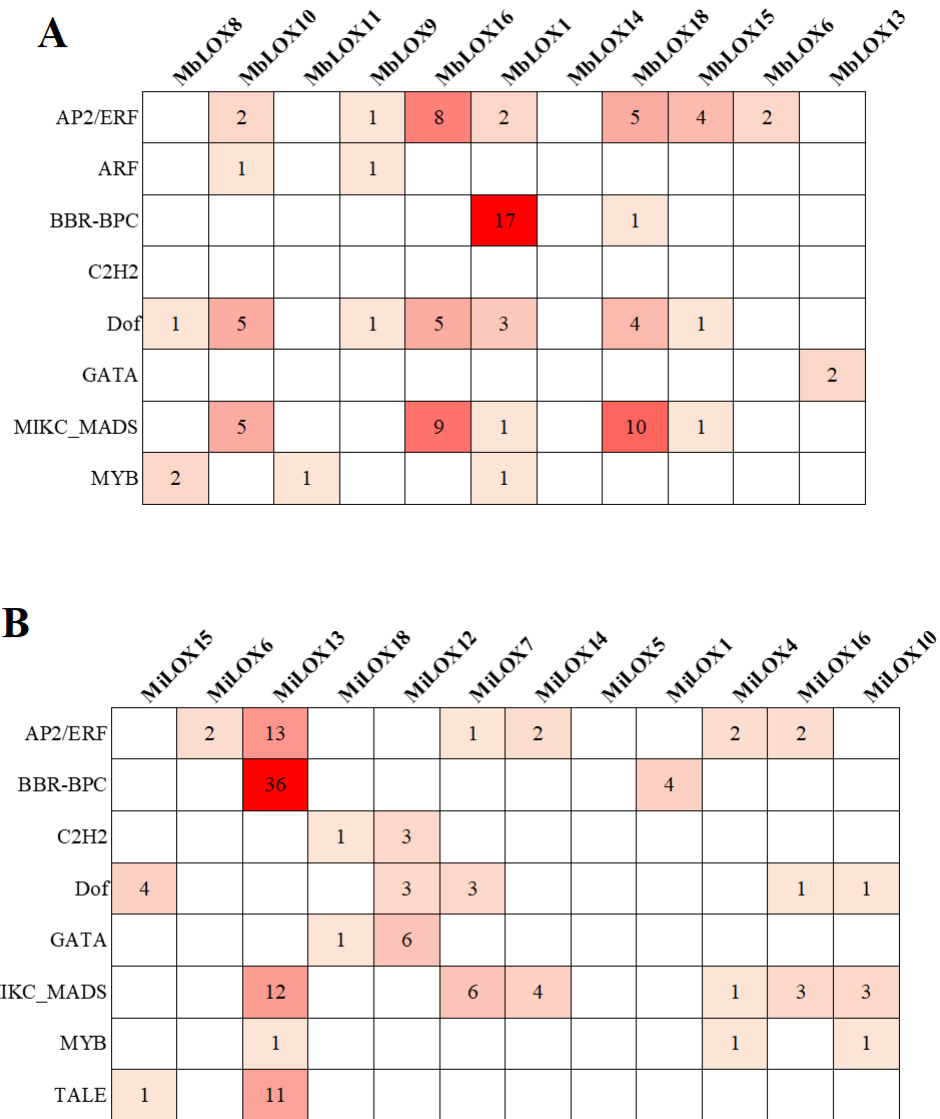

**Figure S13.** Transcription factor binding sites predicted in the promoters of *MbLOXs* (A) and *MiLOXs* (B).

|        |            |            |            |            |            |            |
|--------|------------|------------|------------|------------|------------|------------|
| Arg(R) | <u>CGC</u> | <u>AGG</u> | <u>CGG</u> | <u>AGA</u> | <u>CGA</u> | <u>CGU</u> |
|        | 1.30       | 1.61       | 1.08       | 0.82       | 0.68       | 0.51       |
| Leu(L) | <u>CUG</u> | <u>CUC</u> | <u>UUG</u> | <u>CUU</u> | <u>CUA</u> | <u>UUA</u> |
|        | 2.00       | 1.98       | 0.97       | 0.69       | 0.25       | 0.11       |
| Ser(S) | <u>AGC</u> | <u>UCC</u> | <u>UCG</u> | <u>AGU</u> | <u>UCU</u> | <u>UCA</u> |
|        | 2.07       | 1.46       | 1.18       | 0.50       | 0.50       | 0.30       |
| Ala(A) | <u>GCC</u> | <u>GCG</u> | <u>GCU</u> | <u>GCA</u> | -          | -          |
|        | 1.61       | 1.27       | 0.57       | 0.55       | 0          | 0          |
| Gly(G) | <u>GGC</u> | <u>GGG</u> | <u>GGA</u> | <u>GGU</u> | -          | -          |
|        | 1.99       | 0.91       | 0.71       | 0.39       | 0          | 0          |
| Pro(P) | <u>CCG</u> | <u>CCC</u> | <u>CCU</u> | <u>CCA</u> | -          | -          |
|        | 1.35       | 1.21       | 0.81       | 0.63       | 0          | 0          |
| Thr(T) | <u>ACC</u> | <u>ACG</u> | <u>ACA</u> | <u>ACU</u> | -          | -          |
|        | 1.71       | 1.38       | 0.49       | 0.42       | 0          | 0          |
| Val(V) | <u>GUC</u> | <u>GUG</u> | <u>GUU</u> | <u>GUA</u> | -          | -          |
|        | 1.67       | 1.65       | 0.48       | 0.20       | 0          | 0          |
| Ile(I) | <u>AUC</u> | <u>AUA</u> | <u>AUU</u> | -          | -          | -          |
|        | 2.33       | 0.38       | 0.29       | 0          | 0          | 0          |
| Asn(N) | <u>AAC</u> | <u>AAU</u> | -          | -          | -          | -          |
|        | 1.48       | 0.52       | 0          | 0          | 0          | 0          |
| Asp(D) | <u>GAC</u> | <u>GAU</u> | -          | -          | -          | -          |
|        | 1.35       | 0.65       | 0          | 0          | 0          | 0          |
| Cys(C) | <u>UGC</u> | <u>UGU</u> | -          | -          | -          | -          |
|        | 1.63       | 0.37       | 0          | 0          | 0          | 0          |
| Gln(Q) | <u>CAG</u> | <u>CAA</u> | -          | -          | -          | -          |
|        | 1.43       | 0.58       | 0          | 0          | 0          | 0          |
| Glu(E) | <u>GAG</u> | <u>GAA</u> | -          | -          | -          | -          |
|        | 1.60       | 0.40       | 0          | 0          | 0          | 0          |
| His(H) | <u>CAC</u> | <u>CAU</u> | -          | -          | -          | -          |
|        | 1.44       | 0.56       | 0          | 0          | 0          | 0          |
| Lys(K) | <u>AAG</u> | <u>AAA</u> | -          | -          | -          | -          |
|        | 1.72       | 0.28       | 0          | 0          | 0          | 0          |
| Phe(F) | <u>UUC</u> | <u>UUU</u> | -          | -          | -          | -          |
|        | 1.75       | 0.25       | 0          | 0          | 0          | 0          |
| Tyr(Y) | <u>UAC</u> | <u>UAU</u> | -          | -          | -          | -          |
|        | 1.63       | 0.37       | 0          | 0          | 0          | 0          |
| Trp(W) | <u>UGG</u> | -          | -          | -          | -          | -          |
|        | 1.00       | 0          | 0          | 0          | 0          | 0          |
| Met(M) | <u>AUG</u> | -          | -          | -          | -          | -          |
|        | 1.00       | 0          | 0          | 0          | 0          | 0          |

**Figure S14.** Relative usage of synonymous codons in MbLOX gene family members. The underlined data indicate that the MbLOX genes preferentially to use this codon.

|        |            |            |            |      |      |      |  |  |
|--------|------------|------------|------------|------|------|------|--|--|
| Arg(R) | <u>AGG</u> | <u>CGC</u> | <u>CGG</u> | AGA  | CGA  | CGU  |  |  |
|        | 1.69       | 1.19       | 1.14       | 0.84 | 0.70 | 0.43 |  |  |
| Leu(L) | <u>CUG</u> | <u>CUC</u> | UUG        | CUU  | CUA  | UUA  |  |  |
|        | 1.93       | 1.90       | 0.95       | 0.72 | 0.34 | 0.16 |  |  |
| Ser(S) | <u>AGC</u> | <u>UCC</u> | <u>UCG</u> | AGU  | UCU  | UCA  |  |  |
|        | 1.80       | 1.51       | 1.12       | 0.57 | 0.55 | 0.46 |  |  |
| Ala(A) | <u>GCC</u> | <u>GCG</u> | GCU        | GCA  | -    | -    |  |  |
|        | 1.60       | 1.25       | 0.70       | 0.45 | 0    | 0    |  |  |
| Gly(G) | <u>GGC</u> | <u>GGG</u> | GGA        | GGU  | -    | -    |  |  |
|        | 1.84       | 0.92       | 0.82       | 0.42 | 0    | 0    |  |  |
| Pro(P) | <u>CCG</u> | <u>CCC</u> | CCU        | CCA  | -    | -    |  |  |
|        | 1.42       | 1.04       | 0.80       | 0.75 | 0    | 0    |  |  |
| Thr(T) | <u>ACC</u> | <u>ACG</u> | ACU        | ACA  | -    | -    |  |  |
|        | 1.54       | 1.36       | 0.56       | 0.55 | 0    | 0    |  |  |
| Val(V) | <u>GUC</u> | <u>GUG</u> | GUU        | GUA  | -    | -    |  |  |
|        | 1.68       | 1.65       | 0.43       | 0.24 | 0    | 0    |  |  |
| Ile(I) | <u>AUC</u> | AUA        | AUU        | -    | -    | -    |  |  |
|        | 2.23       | 0.45       | 0.32       | 0    | 0    | 0    |  |  |
| Asn(N) | AAC        | AAU        | -          | -    | -    | -    |  |  |
|        | 1.42       | 0.58       | 0          | 0    | 0    | 0    |  |  |
| Asp(D) | GAC        | GAU        | -          | -    | -    | -    |  |  |
|        | 1.33       | 0.67       | 0          | 0    | 0    | 0    |  |  |
| Cys(C) | <u>UGC</u> | UGU        | -          | -    | -    | -    |  |  |
|        | 1.67       | 0.33       | 0          | 0    | 0    | 0    |  |  |
| Gln(Q) | <u>CAG</u> | CAA        | -          | -    | -    | -    |  |  |
|        | 1.46       | 0.54       | 0          | 0    | 0    | 0    |  |  |
| Glu(E) | <u>GAG</u> | GAA        | -          | -    | -    | -    |  |  |
|        | 1.54       | 0.46       | 0          | 0    | 0    | 0    |  |  |
| His(H) | <u>CAC</u> | CAU        | -          | -    | -    | -    |  |  |
|        | 1.30       | 0.70       | 0          | 0    | 0    | 0    |  |  |
| Lys(K) | <u>AAG</u> | AAA        | -          | -    | -    | -    |  |  |
|        | 1.63       | 0.37       | 0          | 0    | 0    | 0    |  |  |
| Phe(F) | <u>UUC</u> | UUU        | -          | -    | -    | -    |  |  |
|        | 1.64       | 0.36       | 0          | 0    | 0    | 0    |  |  |
| Tyr(Y) | <u>UAC</u> | UAU        | -          | -    | -    | -    |  |  |
|        | 1.57       | 0.43       | 0          | 0    | 0    | 0    |  |  |
| Trp(W) | <u>UGG</u> | -          | -          | -    | -    | -    |  |  |
|        | 1.00       | 0          | 0          | 0    | 0    | 0    |  |  |
| Met(M) | <u>AUG</u> | -          | -          | -    | -    | -    |  |  |
|        | 1.00       | 0          | 0          | 0    | 0    | 0    |  |  |

**Figure S15.** Relative usage of synonymous codons in MiLOX gene family members. The underlined data indicate that the MiLOX genes preferentially to use this codon.
